# Supplementary material
Source: publisher figshare collection journal article supplement (https://gsajournals.figshare.com/articles/dataset/_/10247969)
Supplement: Supplementary file 1 [file 3]

## 1 **Supplementary material**

### 2 **Supplementary figure legends**

#### 3 **Figure S1 (Supplement to Figure 2): Mutants of *rig-3* show increased GLR-** 4 **1::GFP in the AVA cell body**

5 GLR-1::GFP puncta were imaged from AVA near the nerve ring. The images on the  
6 left show GLR-1::GFP expression in wild type (WT, n=12), *rig-3* mutants (n=13) and  
7 a *rig-3*; *Pflp-18*::RIG-3 rescue line (n=12). The dot plot on the right shows the  
8 quantitative measure of fluorescence intensity as an arbitrary fluorescence unit  
9 (AFU). The entire region indicated in the image was taken for fluorescence  
10 quantification. The number of dots in the dot plot shows the number of animals  
11 observed, with each dot representing the fluorescent intensity from a single animal.  
12 The error bars represent SEM. Statistical significance was determined with one-way  
13 ANOVA with Bonferroni's multiple comparison test. Significance is represented as  
14 “\*\*\*”  $p < 0.01$ , “\*\*\*\*”  $p < 0.001$  and “ns” for not significant. The statistics above each plot  
15 indicate significance with respect to the WT plot.

#### 16 **Figure S2 (Supplement to Figure 3): Individual traces associated with the** 17 **Calcium imaging experiment**

18 (A) Traces of calcium activity from freely reversing animals recorded for the whole  
19 duration of a reversal using GCaMP5 expressed specifically in the AVA command  
20 interneuron. The genotypes used include WT and mutant strains (*rig-3*, *glr-1* and *glr-*  
21 *1*; *rig-3*). In this figure each trace is plotted for each genotype imaged (genotypes are  
22 indicated on the top left of each plot). 14 animals were plotted for each genotype. (B)  
23 Graph of body-bends per reversal in WT (n=20), *rig-3* (n=10) and *flp-18* (n=20)  
24 animals. The error bars represent SEM. Statistical significance was determined with  
25 one-way ANOVA with Bonferroni's multiple comparison test. Significance is

represented as “\*\*\*”  $p<0.001$  and “ns” for not significant. The statistics above each plot indicate significance with respect to the WT plot.

**Figure S3 (Supplement to Figure 4): Decreased reversals of *npr-5* mutants could be rescued by NPR-5 expression in sensory neurons**

(A) Reversal assays were performed for a duration of 5 minutes (min) and plotted as dot plots for WT (n=14), *npr-5* (n=14) and *npr-5*; *Pgpa-3::NPR-5* (n=14) animals. The error bars represent SEM. Statistical significance was determined with one-way ANOVA with Bonferroni's multiple comparison test. Significance is represented as “\*\*\*”  $p<0.001$  and “ns” for not significant. The statistics above each plot indicate significance with respect to the WT plot. (B) Reversal assays were performed for a duration of 5 min and plotted as dot plots for WT (n=14), *npr-5* (n=14) and *npr-5*; *Pgcy-5::NPR-5* (n=14) animals. The error bars represent SEM. Statistical significance was determined with one-way ANOVA with Bonferroni's multiple comparison test. Significance is represented as “\*”  $p<0.05$ , “\*\*\*”  $p<0.001$  and “ns” for not significant. The statistics above each plot indicate significance with respect to the WT plot. (C) Dot plot of reversals from WT (n=17), FLP-18++ (n=12), *glr-1* (13) and FLP-18++; *glr-1* (n=18) animals. The error bars represent  $\pm$ SEM. Statistical significance was determined with one-way ANOVA with Bonferroni's multiple comparison test. Significance is represented as “\*\*\*”  $p<0.001$  and “ns” for not significant. The statistics above each plot indicate significance with respect to the WT plot.

**Supplementary video legends**

**Video 1-3: Reversals over a period of 15s**

(1) Representative video indicated a WT control animal recorded for a period of 15s on a plate without food. (2) Representative video indicated a *rig-3* mutant animal

recorded for a period of 15s on a plate without food. (3) Representative video indicated a *rig-3* mutant *C. elegans* expressing RIG-3 under the *rig-3* promoter. The movement of these animals were recorded for a period of 15s on a plate without food.

#### Video 4-7: Calcium imaging in the AVA neuron

Representative video recordings from a moving *C. elegans* with GCaMP5 expressed in the AVA command interneuron of the genotypes given below. The circle indicates the AVA neuron that is being recorded and in the top left corner “F” and “R” indicate forward and reverse movement of the *C. elegans*.

(4) WT

(5) *rig-3*

(6) *glr-1*

(7) *glr-1; rig-3*

#### Supplementary tables

**Table S1: List of strains used in this study**

| Strain         | Genotype                             | Comments                         |
|----------------|--------------------------------------|----------------------------------|
| <b>VC2016</b>  | <i>flp-18 (gk3063) X</i>             | CGC strain                       |
| <b>RB1330</b>  | <i>npr-1 (ok1447) X</i>              | CGC strain                       |
| <b>tm1782</b>  | <i>npr-4 (tm1782) X</i>              | NBRP                             |
| <b>CX14394</b> | <i>npr-5 (ok1583) V</i>              | CGC strain                       |
| <b>AX1444</b>  | <i>Pflp-18::FLP-18::sl2::GFP</i>     | From Mario de bono Lab           |
| <b>KP6535</b>  | <i>glr-1 (n2461); rig-3 (ok2156)</i> | From Josh Kaplan Lab             |
| <b>BAB1541</b> | <i>flp-18 (gk3063) X</i>             | 3X out crossed CGC strain VC2016 |

|                |                                                                                    |                                         |
|----------------|------------------------------------------------------------------------------------|-----------------------------------------|
| <b>BAB1542</b> | <i>npr-1 (ok1447) X</i>                                                            | 3X out crossed<br>CGC strain<br>RB1330  |
| <b>BAB1543</b> | <i>npr-4 (tm1782) X</i>                                                            | 3X out crossed<br>NBRP strain           |
| <b>BAB1544</b> | <i>npr-5 (ok1583) V</i>                                                            | 3X out crossed<br>CGC strain<br>CX14394 |
| <b>BAB1552</b> | <i>Pflp-18::FLP-18::sl2::GFP; npr-5 (ok1583)</i>                                   | This study                              |
| <b>BAB1553</b> | <i>Pflp-18::FLP-18::sl2::GFP; npr-1 (ok1447)</i>                                   | This study                              |
| <b>BAB1554</b> | <i>Pflp-18::FLP-18::sl2::GFP; npr-4 (tm1782)</i>                                   | This study                              |
| <b>BAB1555</b> | <i>Prig-3::HA::GLR-1::GFP</i>                                                      | From Villu Maricq<br>lab                |
| <b>BAB1556</b> | <i>Prig-3:: HA::GLR-1::GFP; rig-3 (ok2156)</i>                                     | This study                              |
| <b>BAB1557</b> | <i>Prig-3:: HA::GLR-1::GFP; rig-3 (ok2156); Pflp-18::RIG-3 (indEx508)</i>          | This study                              |
| <b>BAB1559</b> | <i>npr-5 (ok1583); rig-3 (ok2156)</i>                                              | This study                              |
| <b>BAB1560</b> | <i>rig-3 (ok2156); Prig-3::RIG-3::sl2::wrmScarlet; Punc-122::GFP (indEx508)</i>    | This study                              |
| <b>BAB1561</b> | <i>rig-3 (ok2156); Pflp-18::RIG-3; PCFJ90 (indEx508)</i>                           | This study                              |
| <b>BAB1562</b> | <i>rig-3 (ok2156); Punc-17::RIG-3; PCFJ90 (indEx510)</i>                           | This study                              |
| <b>BAB1563</b> | <i>Prig-3::GCaMP5; PCFJ90 (indEx511)</i>                                           | This study                              |
| <b>BAB1564</b> | <i>rig-3 (ok2156); Prig-3::GCaMP5; PCFJ90 (indEx511)</i>                           | This study                              |
| <b>BAB1565</b> | <i>glr-1 (n2461); Prig-3::GCaMP5; PCFJ90 (indEx511)</i>                            | This study                              |
| <b>BAB1566</b> | <i>glr-1 (n2461); rig-3 (ok2156); Prig-3::GCaMP5; PCFJ90 (indEx511)</i>            | This study                              |
| <b>BAB1567</b> | <i>Pflp-18::FLP-18::sl2::GFP; npr-5 (ok1583); Pgcy-5::NPR-5; PCFJ90 (indEx512)</i> | This study                              |
| <b>BAB1568</b> | <i>Pflp-18::FLP-18::sl2::GFP; npr-5 (ok1583); Pgpa-3::NPR-5; PCFJ90 (indEx513)</i> | This study                              |
| <b>BAB503</b>  | <i>glr-1 (n2461) III</i>                                                           | 3X out crossed<br>CGC strain KP4        |
| <b>BAB501</b>  | <i>rig-3 (ok2156) X</i>                                                            | 3X out crossed<br>CGC strain<br>RB1712  |

|                |                                                                    |            |
|----------------|--------------------------------------------------------------------|------------|
| <b>BAB1571</b> | <i>npr-5 (ok1583); P<sub>gpa-3</sub>::NPR-5; PCFJ90 (indEx513)</i> | This study |
| <b>BAB1572</b> | <i>npr-5 (ok1583); P<sub>gcy-5</sub>::NPR-5; PCFJ90 (indEx512)</i> | This study |
| <b>BAB1573</b> | <i>Prig-3::HA::GLR-1::GFP; rig-3 (ok2156); Prig-3-18::RIG-3</i>    | This study |
| <b>BAB1570</b> | <i>P<sub>flp-18</sub>::FLP-18::sl2::GFP; glr-1 (n2461)</i>         | This study |
| <b>BAB1574</b> | <i>rig-3 (ok2156) flp-18 (gk3063)</i>                              | This study |

67

68 **Table S2: List of primers used in this study**

| <b>Primer Code</b> | <b>Sequence</b>        | <b>Comment</b>              | <b>Gene</b>   |
|--------------------|------------------------|-----------------------------|---------------|
| <b>AB37</b>        | ACCTTTCGGCTCCGACTTG    | WT Forward                  | <i>glr-1</i>  |
| <b>AB38</b>        | ACCTTTCGGCTCCGACTTA    | Mutant Forward              | <i>glr-1</i>  |
| <b>AB39</b>        | ATTGAAATGACCATAACCACC  | Common reverse              | <i>glr-1</i>  |
| <b>AB113</b>       | AGGACGGAAATTACCTGTGC   | Genotyping Forward External | <i>flp-18</i> |
| <b>AB114</b>       | GCTTCGGGAAACGCTCATAT   | Genotyping Reverse Internal | <i>flp-18</i> |
| <b>AB115</b>       | TTATTCTTTCTTGTCTGGGGCC | Genotyping Reverse External | <i>flp-18</i> |
| <b>AB116</b>       | ACCTGTCACTTTTACGCCGG   | Genotyping Forward External | <i>npr-1</i>  |
| <b>AB117</b>       | TGATTCGTTCCAGTTGAACG   | Genotyping Reverse Internal | <i>npr-1</i>  |
| <b>AB118</b>       | GAACCTTCACTTCTCCTGTG   | Genotyping Reverse External | <i>npr-1</i>  |
| <b>AB119</b>       | AGCTGTTGTCTCCTTCCAGG   | Genotyping Forward External | <i>npr-4</i>  |
| <b>AB120</b>       | CGATTTCCGATGAGGAAACC   | Genotyping Reverse Internal | <i>npr-4</i>  |
| <b>AB121</b>       | CACAGCTTCTAATAGGAAAGGG | Genotyping Reverse External | <i>npr-4</i>  |
| <b>AB122</b>       | GCACGACGAACTGCAAATTT   | Genotyping Forward External | <i>npr-5</i>  |

|              |                                              |                                   |                   |
|--------------|----------------------------------------------|-----------------------------------|-------------------|
| <b>AB123</b> | TCCTTGAGTTTTCTGGGATG                         | Genotyping<br>Reverse<br>Internal | <i>npr-5</i>      |
| <b>AB124</b> | AGGCATTTTTGGAAACGGCG                         | Genotyping<br>Reverse<br>External | <i>npr-5</i>      |
| <b>AB108</b> | ACGCGTCGAC<br>TCTGTCACATACTGCTCGAA           | Cloning<br>Forward<br><i>Sall</i> | <i>Pflp-18</i>    |
| <b>AB109</b> | CCCCCGGGGTTGCTGTCTAACCTGAAA                  | Cloning<br>Reverse<br><i>XmaI</i> | <i>Pflp-18</i>    |
| <b>AB139</b> | GCGTCGACAAGTGACACCACGCTCACA                  | Cloning<br>Forward<br><i>Sall</i> | <i>Prig-3</i>     |
| <b>AB140</b> | CCCCCGGGAGCTGTGAAATTTTAGGCA<br>GT            | Cloning<br>Reverse<br><i>XmaI</i> | <i>Prig-3</i>     |
| <b>PRS71</b> | CGAAAAGGGGAGCAAACATCG                        | Genotyping<br>External<br>Forward | <i>rig-3</i>      |
| <b>PRS72</b> | ATCTTGATCTCCTCGTCTCCG                        | Genotyping<br>Internal<br>Reverse | <i>rig-3</i>      |
| <b>PRS73</b> | GCAATACCACACTATCTCCTG                        | Genotyping<br>External<br>Reverse | <i>rig-3</i>      |
| <b>AB148</b> | CTAGCTAGCATGGGACGACTACTTGCCAA<br>GAT         | Cloning<br>Forward<br><i>NheI</i> | <i>rig-3</i> cDNA |
| <b>AB149</b> | CGGGGTACCTTAGATAAAAAGACAGACAA<br>AAAATAACGTG | Cloning<br>Reverse<br><i>KpnI</i> | <i>rig-3</i> cDNA |
| <b>AB209</b> | ACATGCATGCACAAAGTTTTTAAAAGTTG<br>TTGATCGG    | Cloning<br>Forward<br><i>SphI</i> | <i>Pgpa-3</i>     |
| <b>AB210</b> | CCCCCGGGGAAGCACAACCTCTAAAAG<br>CCCA          | Cloning<br>Reverse<br><i>XmaI</i> | <i>Pgpa-3</i>     |
| <b>AB216</b> | ACATGCATGCCGATTGACATTGGTCTTAC<br>ATTTTGAC    | Cloning<br>Forward<br><i>SphI</i> | <i>Pgcy-5</i>     |
| <b>AB217</b> | CCCCCGGGGATTGAAATTCTACTACTTCT<br>GGGGG       | Cloning<br>Reverse<br><i>XmaI</i> | <i>Pgcy-5</i>     |

69

70 **Table S3: List of plasmids used in this study**

| S. No. | Plasmid No. | Plasmid                               |
|--------|-------------|---------------------------------------|
| 1      | pBAB515     | <i>Prig-3::RIG-3::sl2::wrmScarlet</i> |

|   |         |                                                |    |
|---|---------|------------------------------------------------|----|
| 2 | pBAB516 | <i>Pflp-18::RIG-3</i>                          |    |
| 3 | pBAB519 | <i>Pgcy-5::NPR-5</i>                           | 72 |
| 4 | pBAB520 | <i>Pgpa-3::NPR-5</i>                           |    |
| 5 | pAG_09  | <i>Prig-3::GCaMP5</i> (from Cori Bargmann lab) | 74 |
|   |         |                                                | 75 |

76

77
